# Supplementary material for: Immuno-proteomic profiling reveals abundant airway CD8 T cells and ongoing epithelial injury in prolonged post-COVID19 respiratory disease
Source: bioRxiv or medRxiv preprint supplement (doi:10.1101/2021.08.10.21261834), 2021-08-11
Supplement: Supplementary file [file media-2.pdf]

**Table S1: Demographics of the post-COVID19 and healthy control cohort**

Abbreviations: Gender, M (male), BAME (black, Asian and minority ethnic), COPD (chronic obstructive pulmonary disease), CPAP (continuous positive airway pressure), NIV (Non-invasive ventilation), IMV (invasive mechanical ventilation), CT (computed tomography), FEV1 (forced expiratory volume in 1 second), FVC (forced vital capacity), TLC (total lung capacity), TLCO (transfer factor of the lung for carbon monoxide), KCO (carbon monoxide transfer coefficient. Data presented as n (%n), median (IQR)

|                                                       | Post-COVID19 (n = 38) | Healthy controls (n = 29) |
|-------------------------------------------------------|-----------------------|---------------------------|
| Age (years)                                           | 56.5 (51.3-66.0)      | 49.0 (39.5 - 54.5)        |
| Gender, M (%n)                                        | 30 (78.9)             | 17 (58.6)                 |
| BAME (%n)                                             | 22 (57.8)             | N/A                       |
| Comorbidities (%n)                                    |                       |                           |
| Asthma                                                | 5 (13.2)              | N/A                       |
| COPD                                                  | 1 (2.63)              | N/A                       |
| Previous pneumothorax                                 | 1 (2.63)              | N/A                       |
| Hypertension                                          | 9 (23.7)              | N/A                       |
| Ischaemic heart disease                               | 3 (7.89)              | N/A                       |
| Type 2 diabetes mellitus                              | 7 (18.4)              | N/A                       |
| Smoking history                                       |                       |                           |
| Current smoker                                        | 1 (2.63)              | 2 (6.8)                   |
| Ex-smoker (>=10 pack year)                            | 5 (13.2)              | 4 (13.7)                  |
| Non-smoker or ex-smoker <10 pack year)                | 32 (84.2)             | 17 (58.6)                 |
| Severity of acute illness                             |                       |                           |
| Hospitalized (n/%)                                    | 36 (94.7)             | N/A                       |
| - Oxygen therapy only (moderate)                      | 15 (39.5)             | N/A                       |
| - CPAP/ NIV (severe)                                  | 11 (28.9)             | N/A                       |
| - IMV (very severe)                                   | 10 (26.3)             | N/A                       |
| Not hospitalized (moderate)                           | 2 (5.26)              | N/A                       |
| Length of hospital stay (days) [n=35]                 | 10.0 (5.0-27.0)       | N/A                       |
| Admission bloods [n=33]                               |                       |                           |
| White cell count (x10 <sup>9</sup> /L) [n=33]         | 6.80 (5.70-8.85)      | N/A                       |
| Haemoglobin (g/L) [n=33]                              | 143 (132-154)         | N/A                       |
| Platelet (x10 <sup>9</sup> /L) [n=33]                 | 219 (195 – 271)       | N/A                       |
| Neutrophil (x10 <sup>9</sup> /L) [n=33]               | 5.90 (3.75-7.30)      | N/A                       |
| Lymphocyte (x10 <sup>9</sup> /L) [n=33]               | 1.0 (0.70 – 1.45)     | N/A                       |
| D dimer (microgram/L) [n=25]                          | 965 (800-1622)        | N/A                       |
| Fibrinogen (g/L) [n=31]                               | 7.23 (6.21-8.09)      | N/A                       |
| Ferritin (micrograms/L) [n=26]                        | 762 (606-2329)        | N/A                       |
| Sodium (mmol/L) [n=33]                                | 134 (133-137)         | N/A                       |
| Potassium (mmol/L) (n=31)                             | 4.30 (4.1 – 4.70)     | N/A                       |
| Urea (mmol/L) [n=33]                                  | 5.30 (3.40-7.10)      | N/A                       |
| Creatinine (micromol/L) [n=33]                        | 86.0 (75.0-103)       | N/A                       |
| Egfr (ml/min/1.73m <sup>2</sup> ) [n=33]              | 79.0 (58.0-90.0)      | N/A                       |
| Albumin (g/dl) [n=33]                                 | 33.0 (30.5-34.0)      | N/A                       |
| C-reactive protein (mg/L) [n=33]                      | 124 (84.1 – 223)      | N/A                       |
| CT imaging (n=38)                                     |                       |                           |
| Days from admission to follow up CT [n=35]            | 117 (93.0-141)        | N/A                       |
| Days from discharge to follow up CT [n=36]            | 97 (84.3-127)         | N/A                       |
| Abnormal CT                                           |                       | N/A                       |
| Overall CT abnormality                                |                       | N/A                       |
| Ground glass abnormality                              |                       | N/A                       |
| Reticulation                                          |                       | N/A                       |
| Consolidation                                         |                       | N/A                       |
| Bands                                                 |                       | N/A                       |
| Bronchoalveolar lavage fluid sampling (n=38)          |                       |                           |
| Days between admission and sampling [n=35]            | 153 (107-192)         | N/A                       |
| Days between discharge and sampling [n=36]            | 135 (98.5-176)        | N/A                       |
| Lung function tests [ n=36]                           |                       |                           |
| Days between admission and lung function tests [n=33] | 147 (106-185)         | N/A                       |
| Days between discharge and lung function tests [n=34] | 118 (92.0-171)        | N/A                       |
| FEV1 (L)                                              | 2.97 (2.36-3.60)      | 3.26 (2.8 - 3.6)          |
| % predicted FEV1                                      | 95.5 (86.5-103)       |                           |
| FVC (L)                                               | 3.73 (2.83 – 4.16)    | 3.96 (3.5 – 4.9)          |
| % predicted FVC                                       | 91.5 (83.5 – 96.8)    |                           |
| TLC (L)                                               | 5.73 (5.09 – 6.33)    | N/A                       |
| % predicted TLC                                       | 89.0 (83.3 – 99.8)    | N/A                       |
| TLCO ml/min/mmHg                                      | 6.39 (5.32 – 8.57)    | N/A                       |
| % predicted TLCO                                      | 78.5 (67.3 – 96.8)    | N/A                       |
| KCO ml/min/mmHg                                       | 1.37 (1.20-1.61)      | N/A                       |
| % predicted KCO                                       | 99.0 (88.3-115)       | N/A                       |

| BAL<br>highest value during hospitalisation | % CD45 |         |            |          |       |             | total cell numbers |         |            |          |       |             |
|---------------------------------------------|--------|---------|------------|----------|-------|-------------|--------------------|---------|------------|----------|-------|-------------|
|                                             | WCC    | D dimer | Fibrinogen | Ferritin | CRP   | Lymphocytes | WCC                | D dimer | Fibrinogen | Ferritin | CRP   | Lymphocytes |
| AM                                          | -0.13  | -0.08   | 0.08       | -0.44    | 0.16  | 0.06        | 0.08               | 0.22    | 0.36       | -0.19    | 0.02  | 0.2071      |
| CD14+ Monocytes                             | 0.04   | -0.06   | -0.25      | 0.62     | -0.12 | -0.12       | 0.07               | 0.10    | -0.03      | 0.53     | -0.21 | -0.0333     |
| CD14+, CD16+ Monocytes                      | 0.05   | 0.16    | -0.24      | 0.58     | -0.29 | -0.22       | 0.01               | 0.20    | -0.17      | 0.50     | -0.41 | -0.1852     |
| CD16+ Monocytes                             | -0.16  | 0.19    | -0.33      | 0.25     | -0.25 | -0.02       | -0.03              | 0.18    | -0.17      | 0.30     | -0.38 | 0.07909     |
| total Monocytes                             | -0.14  | 0.09    | -0.37      | 0.48     | -0.26 | -0.10       | -0.10              | 0.05    | -0.17      | 0.45     | -0.44 | 0.05411     |
| T cells                                     | -0.04  | 0.17    | 0.01       | 0.25     | -0.18 | -0.02       | 0.06               | 0.29    | 0.14       | 0.25     | -0.15 | 0.1051      |
| NK T cells                                  | 0.34   | 0.02    | 0.14       | 0.38     | 0.01  | -0.34       | 0.25               | 0.06    | 0.12       | 0.39     | -0.19 | -0.1739     |
| B cells                                     | 0.07   | 0.49    | 0.30       | 0.27     | 0.30  | 0.06        | 0.06               | 0.50    | 0.35       | 0.26     | 0.30  | 0.1249      |
| NK cells                                    | -0.01  | 0.13    | 0.13       | 0.13     | 0.11  | 0.15        | 0.05               | 0.29    | 0.24       | 0.12     | 0.02  | 0.2258      |
| Neutrophils                                 | 0.24   | -0.29   | -0.32      | 0.14     | -0.23 | -0.31       | 0.17               | -0.28   | -0.22      | 0.26     | -0.36 | -0.1499     |
| Eosinophils                                 | -0.07  | -0.05   | -0.12      | 0.40     | -0.11 | 0.42        | -0.18              | 0.00    | -0.10      | 0.30     | -0.27 | 0.4912      |
| Lymphocytes                                 | 0.00   | 0.21    | 0.03       | 0.30     | -0.12 | -0.04       | 0.07               | 0.32    | 0.14       | 0.36     | -0.13 | 0.08325     |

**Table S2: Spearman Rank correlation between blood parameters during hospitalisation and immune cell populations in BAL at > 80 days post discharge**

R values of Spearman Rank correlation between blood parameters and immune cell populations in BAL from pCOVID patients. WCC, D-dimer, fibrinogen, ferritin and CRP values are the highest recorded value during hospitalisation. N = 19; Values in green are R > 0.4, values in blue are R < -0.4.

**Table S3.** Demographics, blood tests, CT abnormalities, BALF findings and lung function tests at initial and follow bronchoscopy.

Abbreviations: Gender, M (male), BAME (black, Asian and minority ethnic), COPD (chronic obstructive pulmonary disease), CPAP (continuous positive airway pressure), NIV (Non-invasive ventilation), IMV (invasive mechanical ventilation), CT (computed tomography), FEV1 (forced expiratory volume in 1 second), FVC (forced vital capacity), TLC (total lung capacity), TLCO (transfer factor of the lung for carbon monoxide), KCO (carbon monoxide transfer coefficient)

Data presented as n (%n), median (IQR)

| pCOVID (n = 3)                                     |                   |
|----------------------------------------------------|-------------------|
| Age (years)                                        | 62 (50-71)        |
| Gender, M (%n)                                     | 3 (100)           |
| BAME (%n)                                          | 2 (66.7)          |
| Comorbidities (%n)                                 |                   |
| Asthma                                             | 0 (0)             |
| COPD                                               | 0 (0)             |
| Previous pneumothorax                              | 0 (0)             |
| Hypertension                                       | 3 (0)             |
| Ischaemic heart disease                            | 0 (0)             |
| Type 2 diabetes mellitus                           | 0 (0)             |
| Smoking history                                    |                   |
| Current smoker                                     | 0 (0)             |
| Ex-smoker (>=10 pack year)                         | 1 (33.3)          |
| Non-smoker or ex-smoker <10 pack year)             | 2 (66.7)          |
| Severity of acute illness                          |                   |
| Hospitalized (n/%)                                 | 3 (100)           |
| - Oxygen therapy only (moderate)                   | 0 (0)             |
| - CPAP/ NIV (severe)                               | 0 (0)             |
| - IMV (very severe)                                | 3 (100)           |
| Not hospitalized (moderate)                        | 0 (0)             |
| Length of hospital stay (days) [n=35]              |                   |
|                                                    | 18 (11-28)        |
| Admission bloods [n=3]                             |                   |
| White cell count (x10 <sup>9</sup> /L)             | 9.3 (7.4 – 10.3)  |
| Haemoglobin (g/L)                                  | 140 (130 – 151)   |
| Platelet (x10 <sup>9</sup> /L)                     | 243 (219 – 524)   |
| Neutrophil (x10 <sup>9</sup> /L)                   | 7.7 (6.1 – 9.1)   |
| Lymphocyte (x10 <sup>9</sup> /L)                   | 0.9 (0.7 – 0.9)   |
| D dimer (microgram/L)                              | 1920 (965 – 2874) |
| Fibrinogen (g/L)                                   | 7.5 (7.2 – 8.6)   |
| Ferritin (micrograms/L)                            | 745 (738 – 6032)  |
| Sodium (mmol/L)                                    | 132 (132 – 137)   |
| Potassium (mmol/L)                                 | 4.2 (4.2 – 4.9)   |
| Urea (mmol/L)                                      | 5 (4.4 – 8.1)     |
| Creatinine (micromol/L)                            | 95 (95 – 135)     |
| Egfr (ml/min/1.73m <sup>2</sup> )                  | 70 (49 – 81)      |
| Albumin (g/dL)                                     | 33 (31 – 34)      |
| C-reactive protein (mg/L)                          | 229 (218 – 255)   |
| Treatment during follow up period                  |                   |
| Steroids                                           | 1 (33.3)          |
| Antibiotics                                        | 1 (33.3)          |
| 1 year follow up CT imaging (n=3)                  |                   |
| Days from admission to follow up CT                | 388 (382 – 389)   |
| Days from discharge to follow up CT                | 371 (354-377)     |
| 1 year bronchoalveolar lavage fluid sampling (n=3) |                   |
| Days between admission and sampling                | 410 (402 – 412)   |
| Days between discharge and sampling                | 392 (374 – 401)   |
| 1 year Lung function tests [n=3]                   |                   |
| Days between admission and lung function tests     | 394 (389 – 409)   |
| Days between discharge and lung function tests [   | 378 (366-391)     |
| FEV1 (L)                                           | 3.3 (2.9-3.9)     |
| % predicted FEV1                                   | 104 (97-123)      |
| FVC (L)                                            | 3.9 (3.5 – 4.4)   |
| % predicted FVC                                    | 101 (91 – 106)    |
| TLC (L)                                            | 5.7 (5.6 – 6.7)   |
| % predicted TLC                                    | 94 (91 – 95)      |
| TLCO ml/min/mmHg                                   | 8.8 (7.3 – 9.9)   |

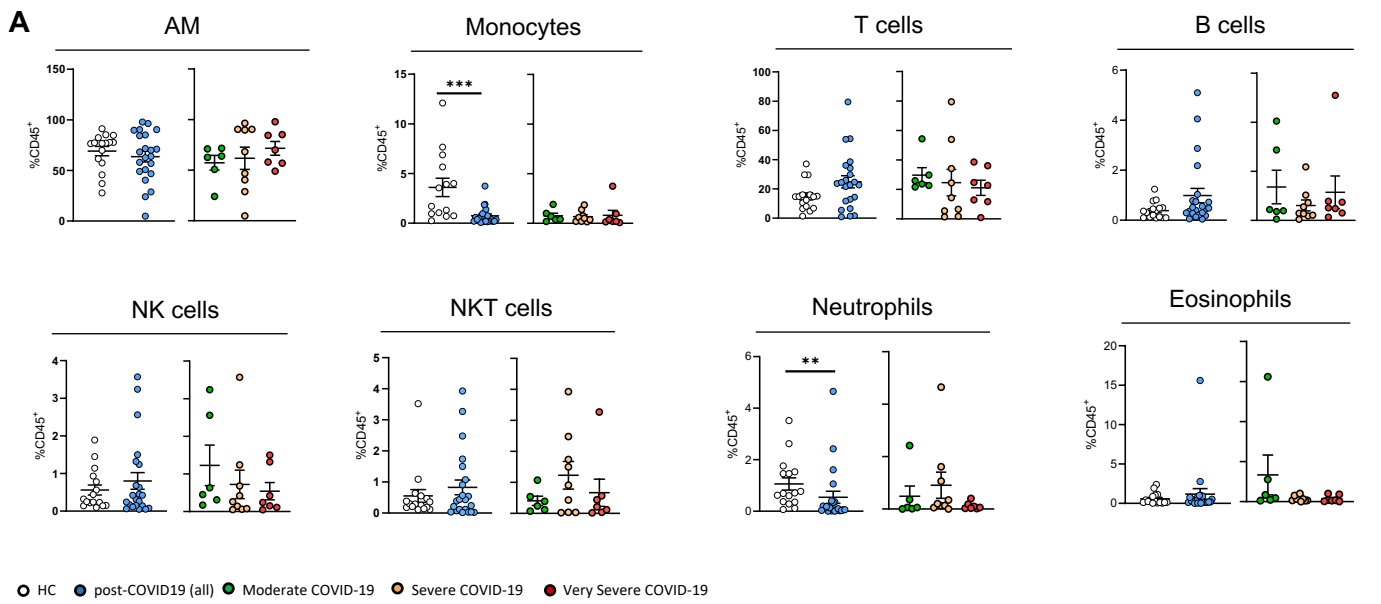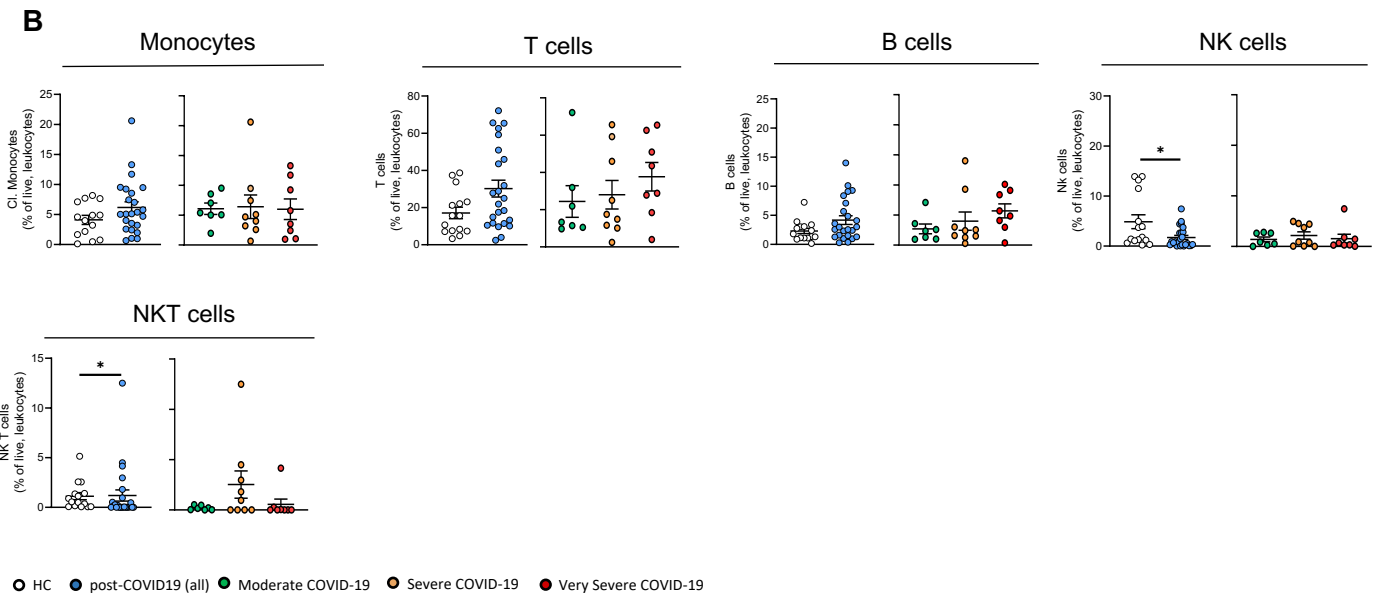

### Figure S1: Flow gating strategy and immune cell proportions in post-COVID19 BAL

(A) Proportional representation of immune cell populations in BAL from healthy controls and post-COVID19 patients. AM = airway macrophages. (B) Proportions of immune populations (% of live, leukocytes) in peripheral blood from healthy controls and post-COVID19 patients. CD14<sup>+</sup> classical monocytes, CD3<sup>+</sup> T cells, CD19<sup>+</sup> B cells, CD56<sup>+</sup> NK cells, CD3<sup>+</sup>/CD56<sup>+</sup> NKT cells. Post-COVID19 patients were split by severity of acute disease.

Data are presented as mean  $\pm$  SEM. Healthy controls n = 16, post-COVID-19 patients n = 22, moderate n = 6, severe n = 9, very severe n = 7. Statistical significance was tested by Mann Whitney U test, Kruskal Wallis test + Dunn's multiple comparison test or Spearman Rank test. \*P < \*\*P < 0.01.

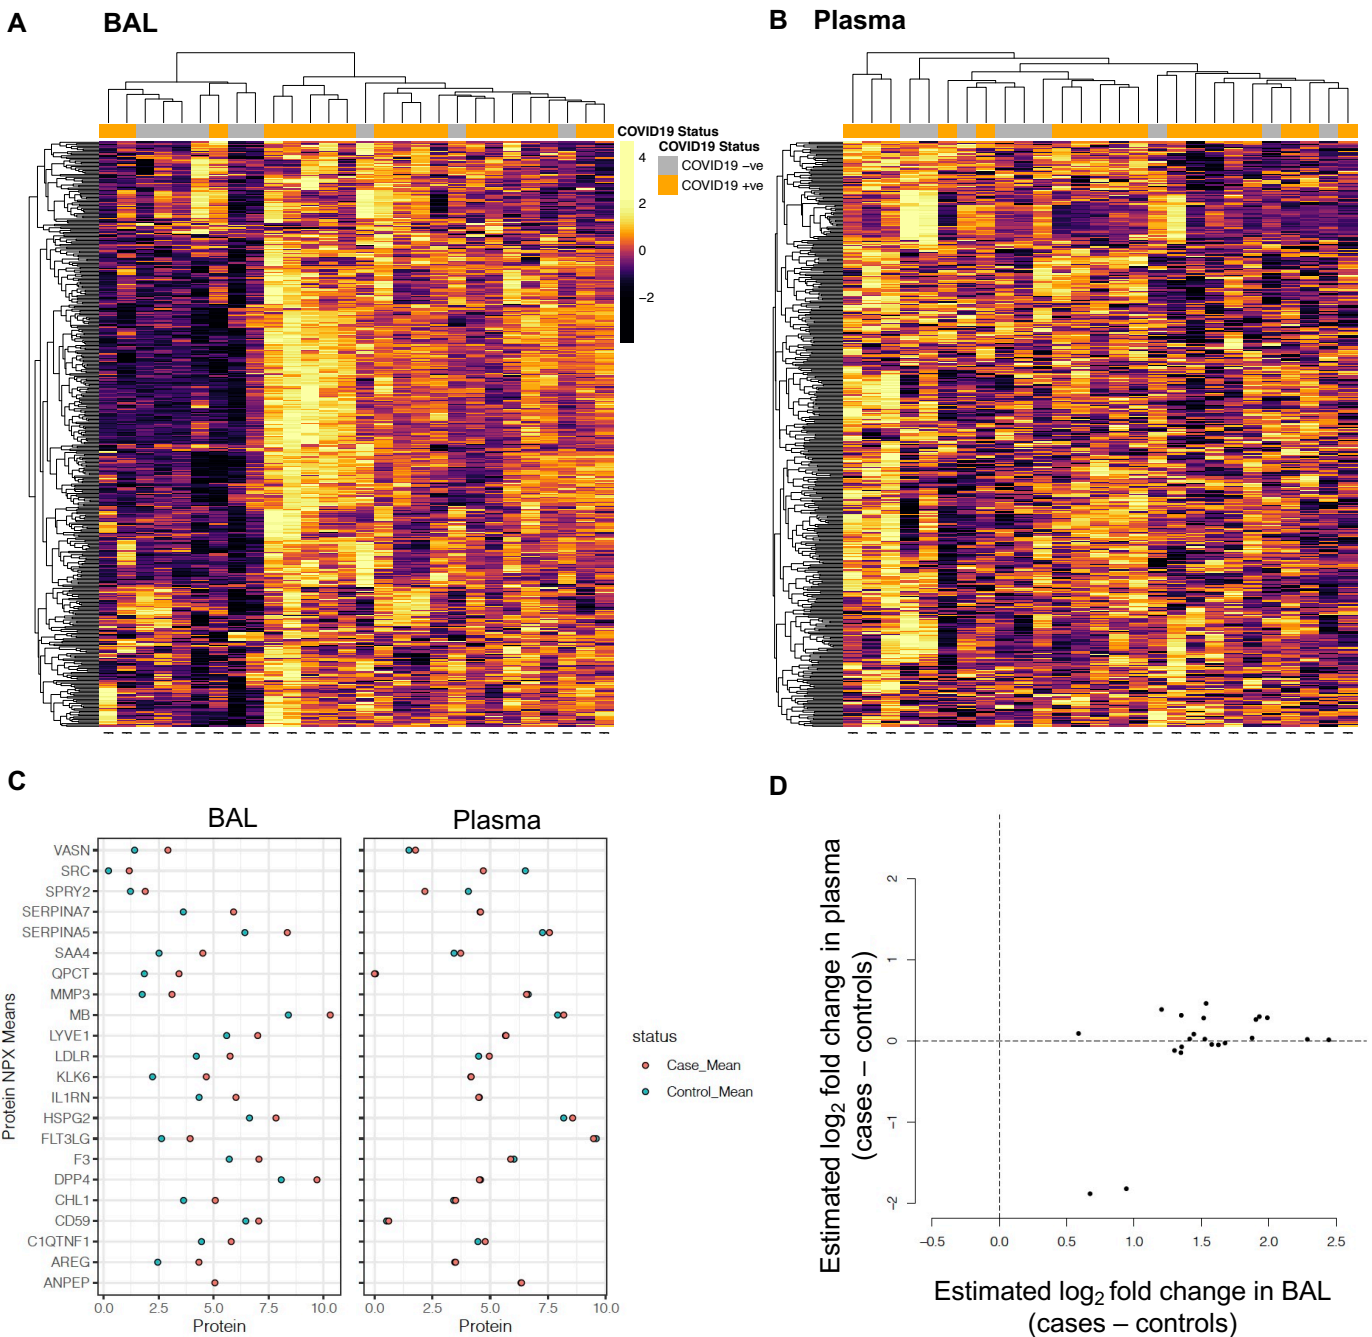

**Figure S2. Post-COVID19 effects on the airway proteome are not mirrored in the blood**  
**(A-B)** Hierarchical clustering of samples and proteins using all 435 proteins measured in A) BAL and B) plasma. Z score normalized protein levels are shown. **(C)** Median NPX values for the 22 proteins that were significantly differentially abundant (5% FDR) in BAL from post-COVID-19 patients versus healthy controls. **(D)** Comparison of effect size estimates in BAL versus plasma for the 22 proteins. Each point represents a protein. The x-axis shows the estimated  $\log_2$  fold change in BAL while the y-axis shows the estimated  $\log_2$  fold change in plasma.

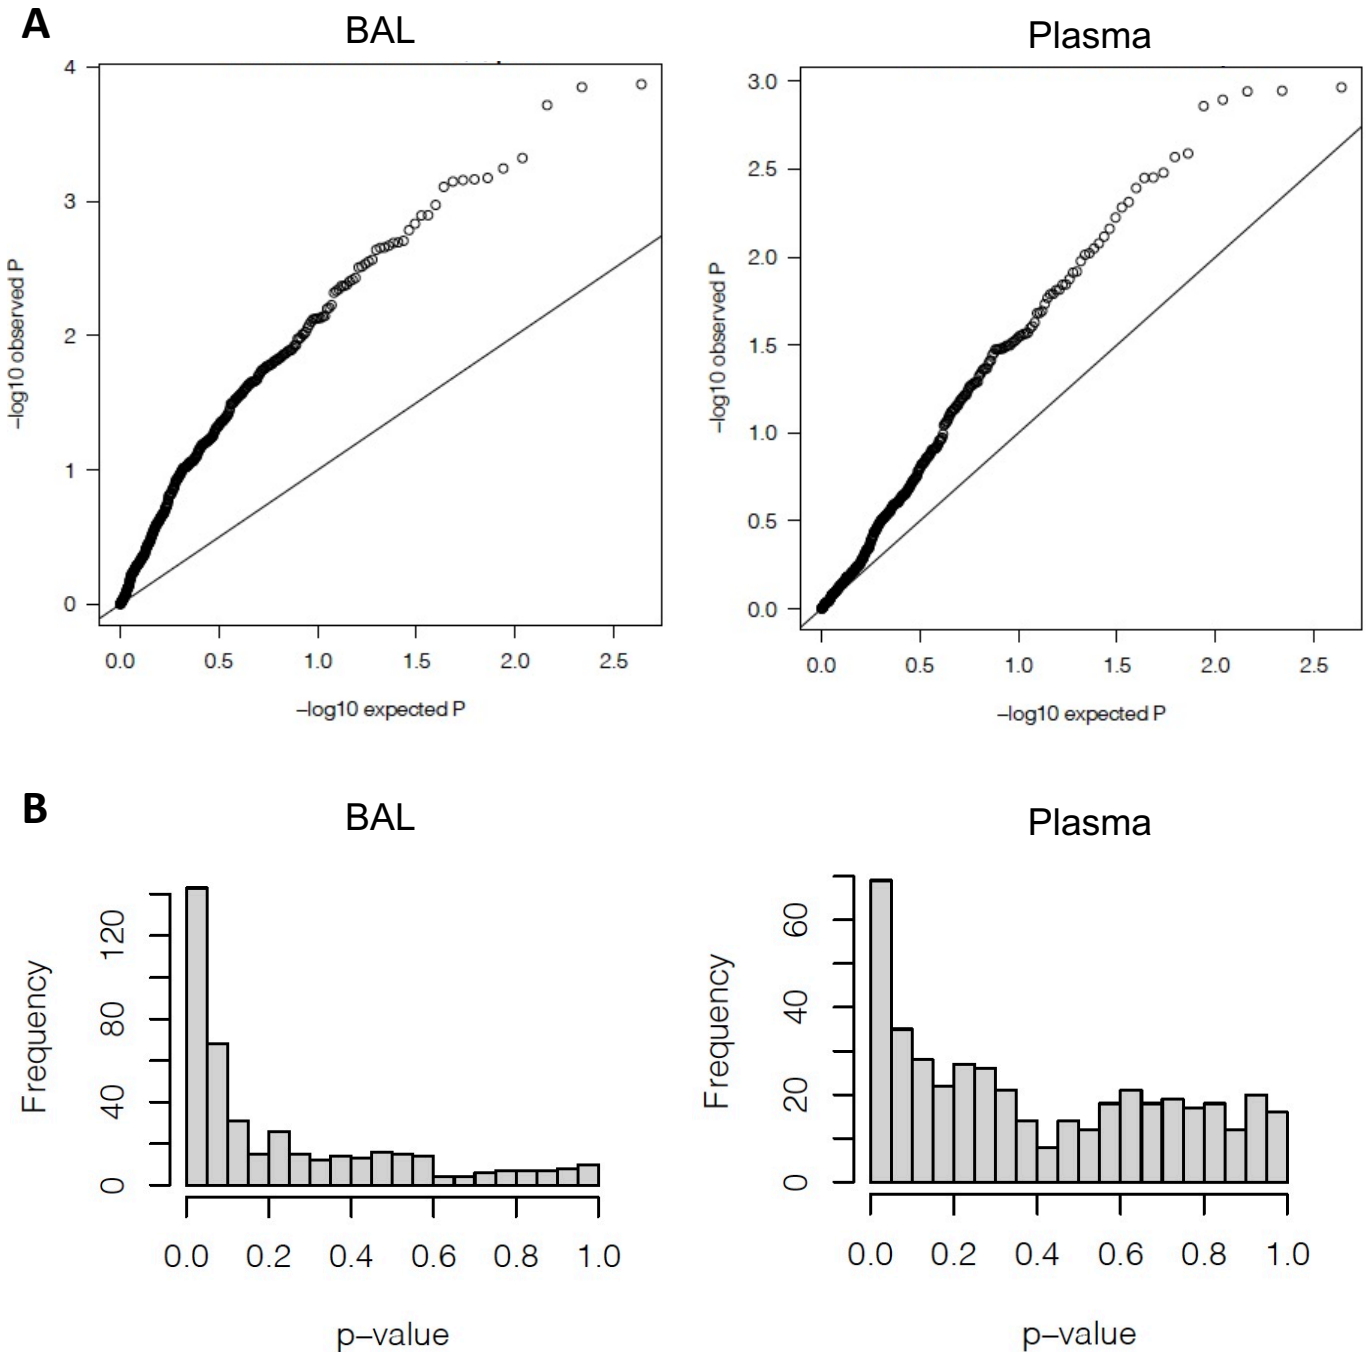

**Figure S3. Statistical evidence for proteomic differences between post-COVID19 and healthy controls**

**(A)** QQ plots showing the expected distribution of  $-\log_{10}$  P-values under the null hypothesis of no association between each protein and case/control status compared to the actual  $-\log_{10}$  P-values observed in the analysis. The plots shows departure from the diagonal, more marked in BAL. **(B)** Histogram of observed nominal p-values from linear regression of each protein on case/control status. The p-values are not uniformly distributed between 0 and 1. Again this is more marked in BAL.

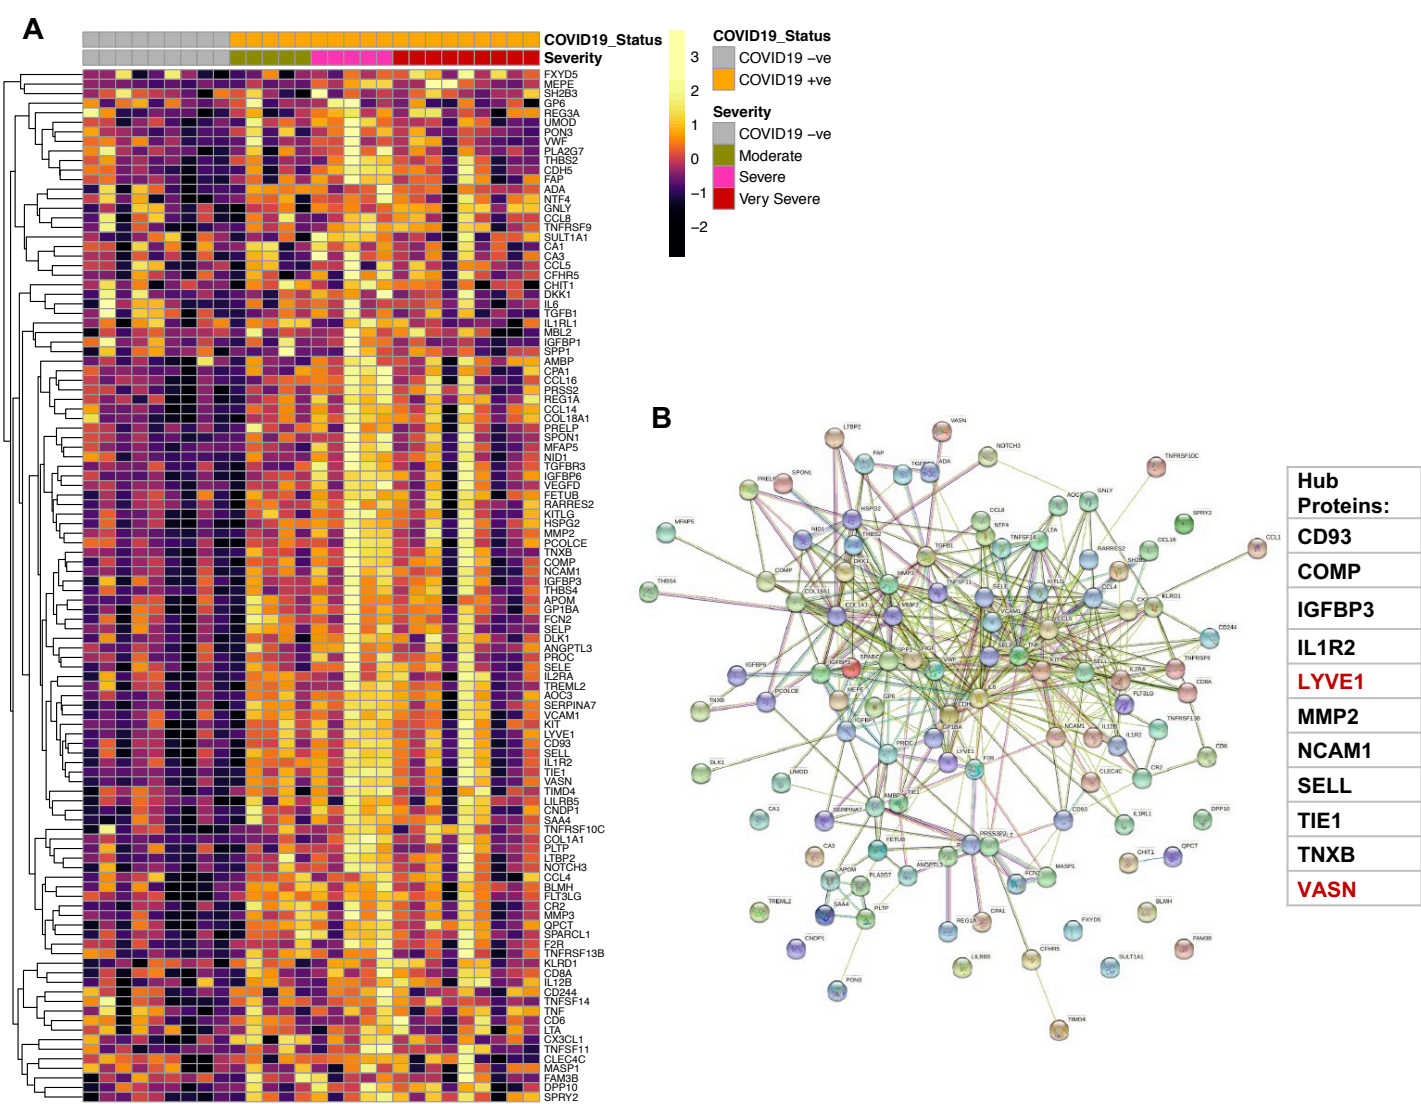

**Figure S4. WGCNA identification of the blue module protein network in the post-COVID19 airway**

**(A)** heatmap displaying Z-score normalised protein abundance for the proteins that form the “blue” eigenprotein module in post-COVID19 and healthy controls in BAL. **(B)** Network representation of proteins in the ‘blue’ module and their interconnections. An edge in the network represents a relationship between proteins defined using String-db. Predicted hub proteins within the network are stated.

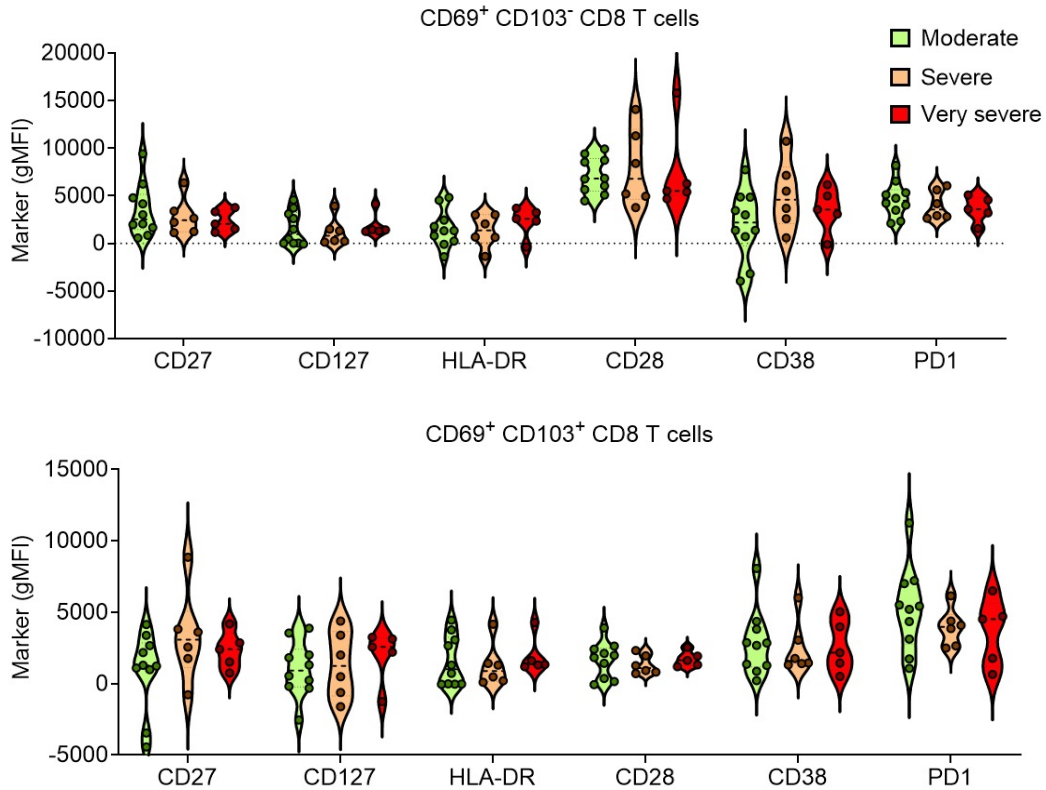

**Figure S5. Activation marker expression on CD8 TRM in the post-COVID19 airway against patient severity**

Airway CD103<sup>-</sup> (top) and CD103<sup>+</sup> (bottom) CD69<sup>+</sup> CD8 T cells were identified in post-COVID19 BAL by spectral deconvolution flow cytometry. Expression of CD27, CD127, HLA-DR, CD28, CD38 and PD-1 was then analysed against acute severity. Geometric mean fluorescence intensity (gMFI) is shown. Each dot represents an individual donor.



**A**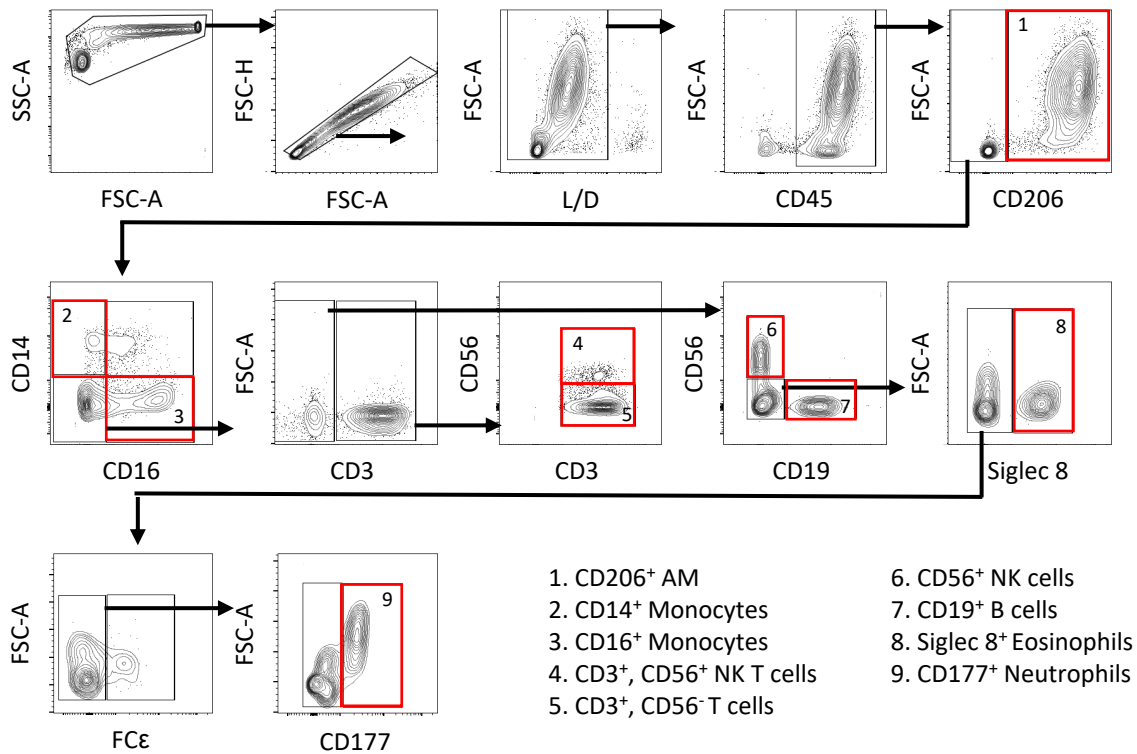

### Methods Figure 1. 11-colour immune phenotyping flow cytometry panel

Gating strategy to determine immune cell populations in BAL from healthy controls and pCOVID patients. After selecting for live, CD45<sup>+</sup> cells, the following populations were analysed: CD206<sup>+</sup> airway macrophages, CD14<sup>+</sup> classical monocytes, CD16<sup>+</sup> non classical monocytes, CD3<sup>+</sup> T cells, CD3<sup>+</sup>/CD56<sup>+</sup> NK T cells, CD19<sup>+</sup> B cells, CD56<sup>+</sup> NK cells, Siglec 8<sup>+</sup> Eosinophils and CD177<sup>+</sup> neutrophils.

1. Macrophages
2. Neutrophils
3. T cells
4. B cells
5. NK cells
6. Monocytes
7. Eosinophils
8. Non-classical monocytes
9. Classical monocytes
10. Plasmacytoid DCs
11. DC2
12. DC1
13. NKT cells
14. ILC2
15. Plasma cells
16. Naive B cells
17. Memory B cells
19. ab T cells
20. gd T cells
21. CD8<sup>+</sup> T cells
22. CD4<sup>+</sup> T cells
23. Naive CD4<sup>+</sup> T cells
24. Antigen-experienced CD4<sup>+</sup> T cells

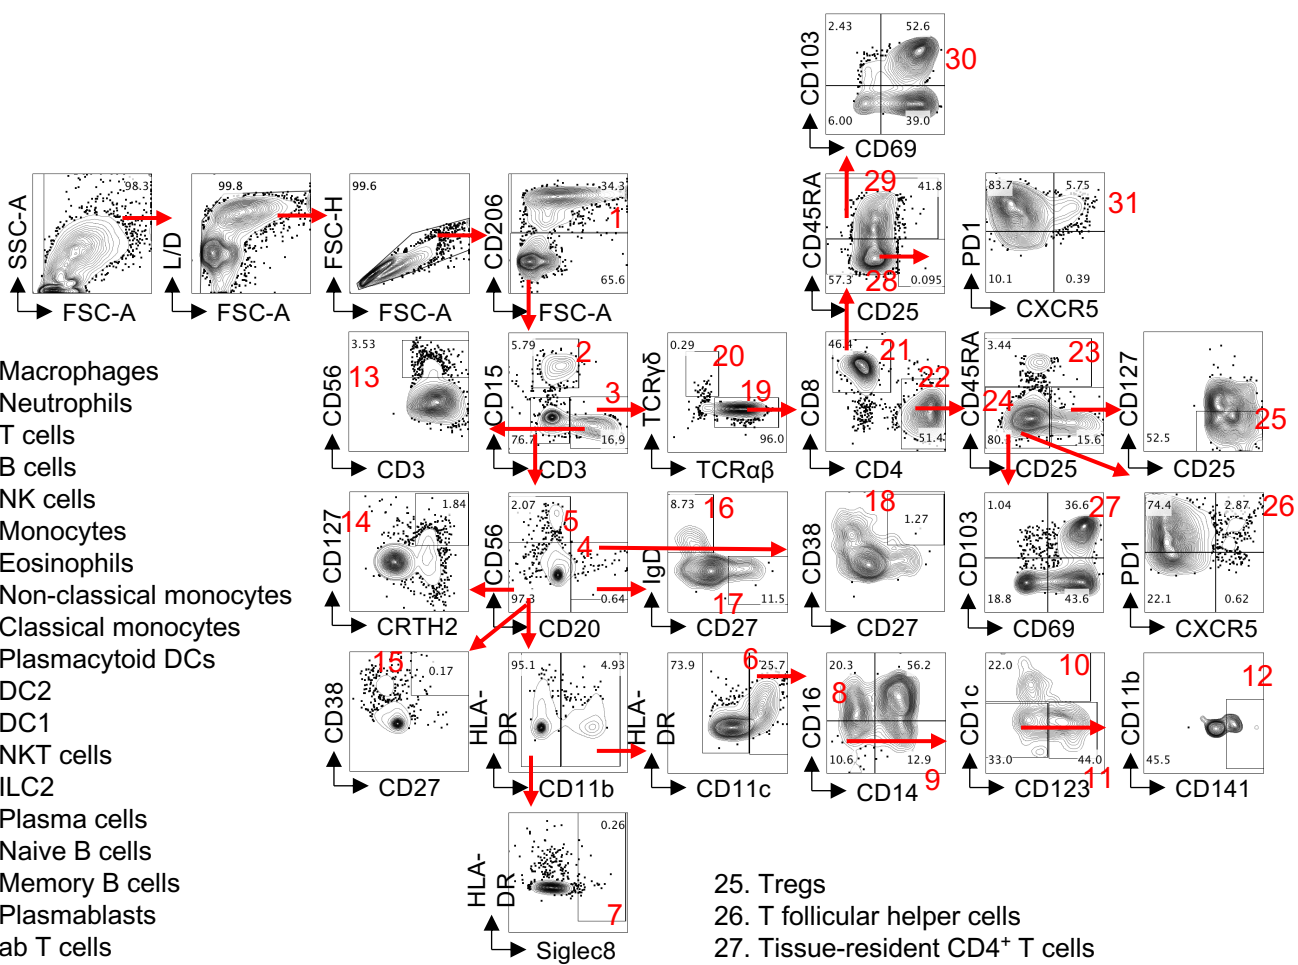

25. Tregs
26. T follicular helper cells
27. Tissue-resident CD4<sup>+</sup> T cells
28. Antigen-experienced CD8<sup>+</sup> T cells
29. Naive CD8<sup>+</sup> T cells
30. Tissue-resident CD8<sup>+</sup> T cells
31. T follicular cytotoxic cells

## Methods Figure 2. Spectral deconvolution high parameter gating strategy

Gating strategy for 34-marker spectral deconvolution flow cytometry panel. Post-COVID19 BAL cells are shown.
